# Supplementary material
Source: PubMed Central journal article supplement (PMC3394458)

Supplementary Figure 1. Size measurements along the developmental trajectories do not differ substantially between RS (black symbols) and BL (red). Panels A and B show (A) body length (standard length, SL), and (B) opercle centroid size (CS) regressed on developmental age. Panel C shows regression of CS on SL. OLS regressions with 95% confidence intervals. All three slopes differ significantly from 0, and the slope in C differs from 1.0 as well, the condition for isometry (data not shown). Symbols match Figure 3 in the main text. Regression equations; A:  $\log_{10}SL = 0.29 + 0.54 \log_{10}DPF$ ,  $R^2=0.98$ . B:  $\log_{10}CS = -1.22 + 0.78 \log_{10}DPF$ ,  $R^2=0.94$ . C:  $\log_{10}CS = -1.64 + 1.44 \log_{10}SL$ ,  $R^2=0.98$ .

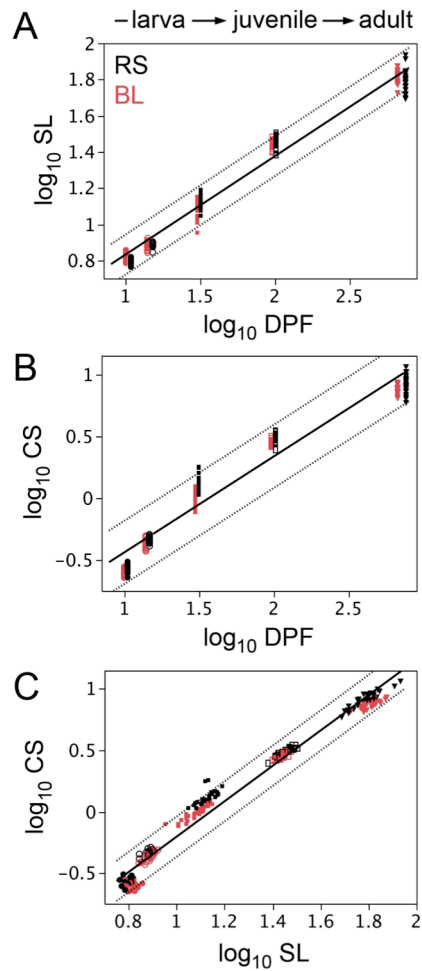

Supplement: NIHMS381744-supplement-Supp_Fig_S1.pdf [file NIHMS381744-supplement-Supp_Fig_S1.pdf]
