# Supplementary material
Source: PubMed Central journal article supplement (PMC3394458)

Supplementary Figure 2. Evolutionary divergence among habitats (oceanic, freshwater) and freshwater populations (BL, Pb, Sk and others) plotted on a shape space defined by the PC1<sub>a</sub> and PC2<sub>a</sub> axes. The plot shows the adult wild-captured individuals as in Fig. 5B in the main text, with colors, symbols, and abbreviations matching Fig. 5B. The thin plate spline diagrams match the presentation in Fig. 5A, but here are constructed from the adult-wild captured dataset on the PC1<sub>a</sub> and PC2<sub>a</sub> axes. As in Fig. 5B the freshwater fish have lower PC1 scores than oceanic fish with BL showing extremely low PC1<sub>a</sub> scores. Pb opercles score at low PC2<sub>a</sub>. Sk opercles score at high PC2<sub>a</sub>.

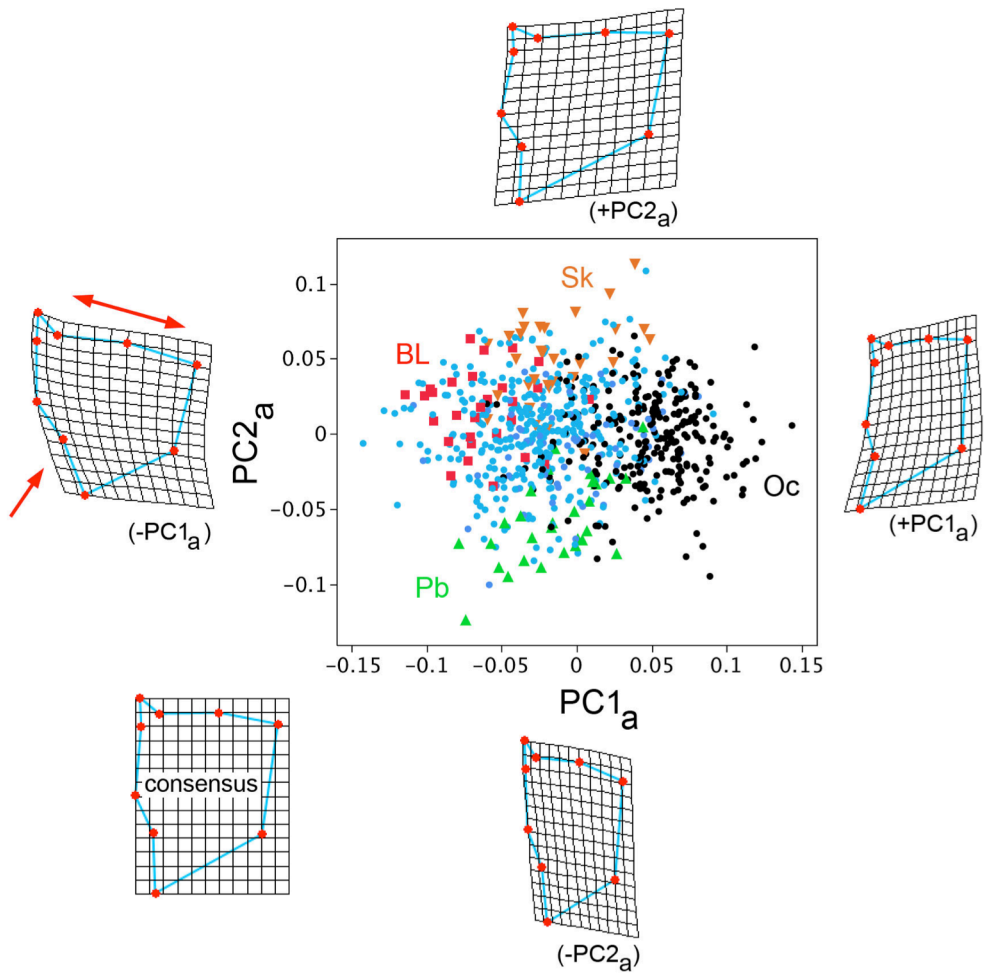

Supplement: NIHMS381744-supplement-Supp_Fig_S2.pdf [file NIHMS381744-supplement-Supp_Fig_S2.pdf]
