# Supplementary material
Source: PubMed Central journal article supplement (PMC3394458)

Supplementary Figure 3. Shape-size spaces of opercle development constructed by plotting  $PC1_d$  scores (A, note the similarity of this plot to Fig. 3A in the main text), and  $PC2_d$  scores (B) versus CS. Supporting dissociation between shape developments captured by the two PCs, the changes between RS and BL look distinctively different in A and B. Symbols match Figure 3 in the main text

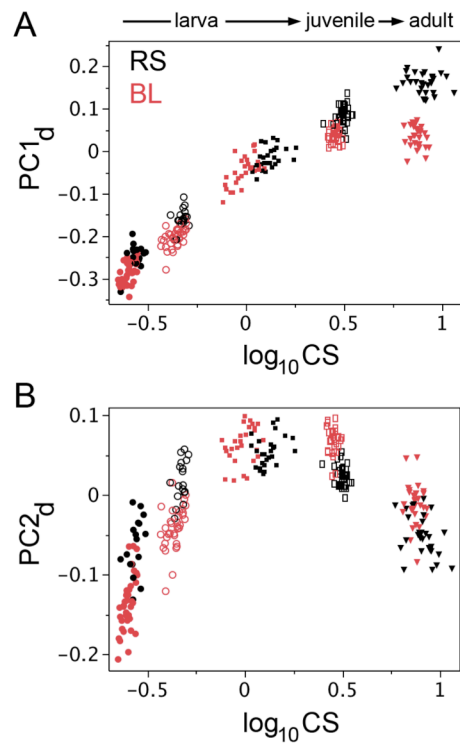

Supplement: NIHMS381744-supplement-Supp_Fig_S3.pdf [file NIHMS381744-supplement-Supp_Fig_S3.pdf]
